# Supplementary material for: Production of Secondary Metabolites in Extreme Environments: Food- and Airborne Wallemia spp. Produce Toxic Metabolites at Hypersaline Conditions
Source: PLoS One. 2016 Dec 30;11(12):e0169116. doi: 10.1371/journal.pone.0169116 (PMC5201246; doi:10.1371/journal.pone.0169116)
Supplement: S1 Table — (XLSX) [file pone.0169116.s002.xlsx]

## Sheet: Strains
S1 Table: List of analyzed strains, their sources, and size of their colonies grown on YES, CYAS, and WATM with NaCl, glucose and MgCl2 added in different concentrations at 25 °C in the dark after 10 days.
Taxon	Strain no.	Substrate	Country	Mean colony diameter (mm)
				YES	CYA (CYAS)	WATM
				0	5% NaCl	5 % NaCl	15% NaCl	20% NaCl	25% NaCl	20% glucose	55% glucose	60% glucose	70% glucose	4% MgCl2	11% MgCl2	17% MgCl2
Wallemia sebi	CBS 818.96NT	Sunflower seed	Sweden	8	7	8	5	2	0	8	4	0	0	8	4	0
	CBS 110584a WON pozitive	Unknown	United Kingdom
	EXF-1441b WOL pozitive	Unknown	Slovenia
	EXF-5860	Hypersaline water of solar saltern	Slovenia
	MUCL 46253c	Flavoured mineral water	France
Wallemia mellicola	EXF-5675	Spoiled jam	Slovenia	9	8	9	3	1	0	10	6	0	0	7	3	0
	EXF-5677	Air before apiary	Slovenia
	EXF-5918	Ceiling in the children’s room	Slovenia
	UAMH 2757d	Soil	Canada
	UAMH 6689	Maple syrup	Canada
Wallemia canadensis	MUCL 15061T	Peat soil from cedar swamp	Canada	8	6	6	3	1	0	8	5	0	0	6	2	0
	DAOM 226642e	Indoor of residence	Canada
	DAOM 242570	Indoor environment	Canada
	DAOM 242571	Indoor environment	Canada
Wallemia tropicalis	EXF-8739T	House dust	Uruguay	6	6	6	4	1	0	6	4	0	0	7	4	0
	EXF-8744	House dust	Indonesia
	EXF-8746	Dust in association office	Micronesia
Wallemia muriae	CBS 116628T	Hypersaline water of saltern	Slovenia	3	6	6	2	0	0	7	5	0	0	7	2	0
	EXF-2361	Chocolate	Slovenia
	EXF-3554	Saturated sugar solution	Slovenia
	EXF-5673	Pollen basket (corbicula) of honey bee	Slovenia
	EXF-5915	Living room wall	Slovenia
Wallemia ichthyophaga	EXF-994T	Hypersaline water of solar saltern	Slovenia	0	0	0	8	4	2	0	0	0	0	0	3	4
	EXF-3555	Salted ham	Slovenia
	EXF-5676	Sea salt	Slovenia
	EXF-6070	Bitterns	Slovenia
	EXF-6200	Hypersaline water of solar saltern	Slovenia
Wallemia hederae	EXF-5753T	Ivy flowers (pollen)	Slovenia	8	5	8	4	1	0	10	0	0	0	7	3	0
	EXF-8357	Air in hay barn	Slovenia
	EXF-8358	Air in hay barn	Slovenia
YES = Yeast Extract Sucrose agar
CYA = Czapek Yeast Autolysate agar with 50 g/L NaCl
WATM = Wickerhams Antibiotic Test Medium
a: CBS = CBS-KNAW Fungal Biodiversity Centre, Utrecht, The Netherlands
b: EXF = Ex Culture Collection of the Department of Biology, Biotechnical Faculty, University of Ljubljana in Ljubljana, Infrastructural Centre Mycosmo, MRIC UL, Ljubljana, Slovenia
c: MUCL = Mycotheque of the Catholic University of Louvain, Louvain la Neuve, Belgium
d: UAMH = University of Alberta Microfungus Collection and Herbarium, Edmonton, Canada
e: DAOM = Canadian Collection of Fungal Cultures, Agriculture and Agri-Food Canada, Ottawa, Canada
NT = ex-neotype strain
T = ex-type strain

## Sheet: Growth
Table S1: List of analyzed strains, their sources, and size of their colonies grown on YES, CYAS, and WATM with NaCl, glucose and MgCl2 added in different concentrations at 25 °C in the dark after 10 days.
Taxon	Mean colony diameter (mm)
	YES	CYA (CYAS)	WATM
	0	0	0.05	0.15	0.2	0.25	0.2	0.55	0.6	0.7	0.04	0.11	0.17
Wallemia sebi	8	8	8	5	2	0	8	4	0	0	8	4	0
Wallemia mellicola	9	9	9	3	1	0	10	6	0	0	7	3	0
Wallemia canadensis	8	8	6	3	1	0	8	5	0	0	6	2	0
Wallemia tropicalis	6	6	6	4	1	0	6	4	0	0	7	4	0
Wallemia muriae	3	3	6	2	0	0	7	5	0	0	7	2	0
Wallemia ichthyophaga	0	0	0	8	4	2	0	0	0	0	0	3	4
Wallemia hederae	8	8	8	4	1	0	10	0	0	0	7	3	0
