# Supplementary material for: Production of Secondary Metabolites in Extreme Environments: Food- and Airborne Wallemia spp. Produce Toxic Metabolites at Hypersaline Conditions
Source: PLoS One. 2016 Dec 30;11(12):e0169116. doi: 10.1371/journal.pone.0169116 (PMC5201246; doi:10.1371/journal.pone.0169116)
Supplement: S2 Table — (XLSX) [file pone.0169116.s003.xlsx]

## Sheet: clusters
S2 Table: Secondary metabolite biosynthetic homologous gene clusters in W. mellicola and W. ichthyophaga
Secondary metabolites biosynthetic cluster type	Homologous genes
	W. ichthyophaga (EXF-994)				W. mellicola(CBS 633.66)
	Cluster number	Gene name	Authomatic annotation	Signature pHMM hits	Cluster number	Gene Name	Authomatic annotation	Signature pHMM hits
NRPS	5	J056_001752	Nonribosomal peptide synthetase 2	Condensation; AMP-binding; PP-binding	1	WALSEDRAFT_42211	Acetyl-CoA synthetase-like protein	Condensation; AMP-binding; PP-binding
Terpene	1	J056_002076	Lanosterol synthase	Terpene cyclase	2	WALSEDRAFT_14803	Terpene synthase	Terpene cyclase
Terpene	4	J056_001663	Farnesyl-diphosphate farnesyltransferase	Phytoene synthase		WALSEDRAFT_48978	Farnesyl-diphosphate farnesyltransferase	Phytoene synthase
Terpene	6	J056_001922	Hypotetical protein	Phytoene synthase		WALSEDRAFT_22107/ WALSEDRAFT_61406	2-oxoglutarate dehydrogenase, E1 component/Uncharacterized protein	Phytoene synthase
Other	3	J056_001507	Polyketid synthase PksJ	AMP-binding; PP-binding		WALSEDRAFT_32203/ WALSEDRAFT_63749	Acetyl-CoA synthetase-like protein/ Uncharacterized protein	AMP-binding; PP-binding
Other	7	J056_002659	L-aminoadipate-semialdehyde dehydrogenase	AMP-binding; PP-binding; NAD_binding_4		WALSEDRAFT_22743	Alpha-aminoadipate reductase Lys1p	AMP-binding; PP-binding; NAD_binding_4
Other	8	J056_002753	Linear gramicidin synthase subunit D lgrD	AMP-binding; PP-binding; NAD_binding_5	4	WALSEDRAFT_68426	Acetyl-CoA synthetase-like protein	AMP-binding; PP-binding; NAD_binding_5
Other	2	J056_004091/J056_004092; J056_004095*	4-coumarate-CoA ligase-like 7; Linear gramicidin synthase subunit D	AMP-binding; AMP-binding; NAD_binding_4		NONE	/	AMP-binding; AMP-binding; NAD_binding_4
Terpene	/	/	/	/	3	WALSEDRAFT_16539**	Terpenoid synthase	Terpene synthase cyclase
Other	/	/	/	/		WALSEDRAFT_61471**	Acetyl-CoA synthetase-like protein	AMP-binding; NAD_binding_4
