# Supplementary material for: Production of Secondary Metabolites in Extreme Environments: Food- and Airborne Wallemia spp. Produce Toxic Metabolites at Hypersaline Conditions
Source: PLoS One. 2016 Dec 30;11(12):e0169116. doi: 10.1371/journal.pone.0169116 (PMC5201246; doi:10.1371/journal.pone.0169116)
Supplement: S3 Table — (XLSX) [file pone.0169116.s004.xlsx]

## Sheet: S3
S3 Table. Secondary metabolites detected by HPLC-DAD analysis.
Number	Metabolite code	Retention time (min)	UV/VIS spectrum wave length [nm] (relative peak high [%])
1	BOM0	1.47	210 (100), 285 (30)
2	BOM1	2.52	210 (100), 285 (30)
3	BOM10	1.54	210 (100), 285 (30)
4	CLOM0	1.6	192 (100), 254 (60)
5	CLOM1	1.35	193 (100), 256 (60)
6	DAB	2.68	193(100), 227 (50), 300 (40)
7	DIPIC1	1	195 (100), 220 (60), 284 (90)
8	DIPIC2	1.74	195 (100), 220 (60), 284 (90)
9	DIPIC3	5.02	191 (80), 230 (30), 298 (100)
10	DIPIC4	1.95	195 (100), 220 (60), 284 (90)
11	DOB	3.42	196 (100), 245 (40), 306 (40)
12	DOL1	0.74	192 (100), 255 (20)
13	DOL10	0.78	191 (100), 256 (20)
14	DOL11	0.89	192 (100), 256 (20)
15	DOL20	0.5	193 (100), 255 (60)
16	END0	1.83	190 (100)
17	END1	1.22	190 (100)
18	END10	0.99	190 (100)
19	END2	1.6	190 (100)
20	END20	0.29	190 (100)
21	END3	3.27	190 (100)
22	END4	2.59	190 (100)
23	END5	0.95	190 (100)
24	ERGO0	8.66	272 (95), 282 (100), 293 (70)
25	ERGO20	7.49	272 (95), 282 (100), 293 (70)
26	ERU1	4.23	279 (100)
27	ERU2	4.69	279 (100)
28	ERU20	4.17	279 (100)
29	INDO1	1.71	195 (60), 220 (100), 283 (20)
30	INDO10	1.77	200 (40), 218 (100), 275 (20)
31	INDO11	2.07	194 (60), 218 (100), 280 (20)
32	INDO2	1.63	194 (60), 218 (100), 280 (20)
33	INDO20	1.29	199 (60), 218 (100), 280 (20)
34	INDO3	2.59	195 (60), 218 (100), 280 (20)
35	INDO5	2.82	194 (60), 218 (100), 280 (20)
36	INDO6	5	197 (60), 222 (100), 280 (20)
37	INDO7	2.86	194 (60), 220 (100), 280 (20)
38	MODO	2.47	194 (100), 230 (40), 350 (50)
39	MOL0	0.57	200 (100), 258 (30), 294 (20)
40	MOL10	0.59	200 (100), 260 (30), 292 (20)
41	MOL11	0.72	200 (100), 260 (30), 292 (20)
42	MOL12	1.28	190 (100), 255 (30), 294 (20)
43	MOL20	0.52	190 (100), 258 (30), 290 (20)
44	MOL3	0.8	201 (100), 260 (30), 295 (20)
45	MOL4	0.97	199 (100), 258 (30), 294 (20)
46	MOL5	1.18	200 (100), 262 (30), 295 (20)
47	NOU	2.23	203 (100), 253 (40), 293 (40)
48	OFLO1	2.57	208 (100), 247 (20), 359 (30)
49	OFLO2	3.91	205 (100), 242 (40), 353 (20)
50	OFLO3	3.58	204 (100), 242 (40), 360 (20)
51	PAL0	1.97	211 (100)
52	PAL1	3.44	192 (100)
53	PAL10	2.3	210 (100)
54	PAL2	3.76	193 (100)
55	PAL20	0.7	203 (100)
56	PAL21	2.65	192 (100)
57	PAL22	2.53	200 (100)
58	PAL23	2.02	210 (100)
59	PAL24	6.4	191 (100)
60	PAL3	3.33	200 (100)
61	PAL4	3.15	195 (100)
62	PALO0	4.44	200 (100)
63	PALO1	4.56	193 (100)
64	PALO2	5.01	193 (100)
65	PALO3	5.77	198 (100)
66	PALO4	5.89	196 (100)
67	PALO5	7.63	192 (100)
68	PALO6	4.7	199 (100)
69	PALO7	6.04	198 (100)
70	PALO8	6.15	198 (100)
71	RAI0	0.87	203 (90), 216 (100), 260 (50), 295 (30)
72	RAI1	1.7	202 (90), 217 (100), 260 (50), 295 (30)
73	RAI10	0.92	202 (90), 217 (100), 260 (50), 295 (30)
74	RHIO1	6.95	190 (60), 220 (20), 296 (100)
75	RHIO2	5.8	190 (60), 222 (20), 296 (100)
76	ROED1	1.94	194 (100), 266 (60), 355 (20), 600 (10)
77	ROED10	2.02	190 (100), 268 (30), 356 (20), 600 (10)
78	ROED11	2.32	190 (100), 270 (30), 356 (40), 600 (10)
79	ROED2	1.55	192 (100), 270 (40), 360 (40), 580 (20)
80	ROED3	1.64	195 (100), 260 (50), 290 (40), 580 (20)
81	ROED4	1.2	190 (100), 267 (40), 340 (20), 580 (20)
82	SEBI1	1.29	207 (100), 240 (40), 300 (40)
83	SEBI2	4.69	207 (100), 240 (40), 300 (40)
84	SEBI3	2.33	206 (100), 240 (40), 300 (40)
85	VITA1	1.7	220 (100), 260 (40), 360 (5)
86	VITA2	2.86	218 (100), 260 (80), 360 (20)
87	YEL1	3.3	218 (100), 250 (90), 280 (70), 500 (20)
88	YEL10	2.41	200 (100), 260 (80), 300 (80), 500 (20)
89	YEL11	3.38	200 (100), 260 (80), 300 (80), 500 (20)
90	YEL13	3.75	200 (100), 260 (80), 300 (80), 500 (20)
91	YEL3	2.63	190 (100), 260 (80), 300 (40), 450 (20)
92	YEL4	2.46	200 (100), 250 (70), 300 (50), 490 (20)
93	YEL5	2.02	190 (100), 260 (80), 300 (40), 450 (20)
94	YEL7	1.28	210 (100), 260 (50), 300 (50), 500 (10)
95	YEL8	3.05	210 (100), 257 (90), 300 (70), 510 (20)
96	YEL9	1.95	210 (100), 260 (90), 300 (90), 490 (30)
