# Supplementary material for: Production of Secondary Metabolites in Extreme Environments: Food- and Airborne Wallemia spp. Produce Toxic Metabolites at Hypersaline Conditions
Source: PLoS One. 2016 Dec 30;11(12):e0169116. doi: 10.1371/journal.pone.0169116 (PMC5201246; doi:10.1371/journal.pone.0169116)
Supplement: S4 Table — (XLS) [file pone.0169116.s005.xls]

## Sheet: S4
	S4 Table: Dataset from HPLC-DAD analysis for machine leraning analysis.
	Species	Strain	Medium			Solute
Number			WATM	YES	CYAS	NaCl (%)	Glucose (%)	MgCl2 (%)	MOL10	MOL0	MOL11	MOL12	MOL3	MOL4	MOL5	MOL20	DOL10	DOL11	DOL1	DOL20	RAI10	RAI0	RAI1	END10	END0	END1	END2	END3	END4	END5	END20	DIPIC1	DIPIC2	DIPIC4	DIPIC3	CLOM1	CLOM0	VITA1	VITA2	BOM10	BOM0	BOM1	INDO10	INDO1	INDO2	INDO3	INDO11	INDO5	INDO6
	Wallemia hederae	EXF-5753	1			5	0	0					13																							20										8.5
1	Wallemia hederae	EXF-5753	1			15	0	0					23
4	Wallemia hederae	EXF-5753	1			0	20	0																											5	20										10
5	Wallemia hederae	EXF-5753	1			0	55	0
9	Wallemia hederae	EXF-5753		1		0	0	0																												5										5
10	Wallemia hederae	EXF-5753			1	5	0	0																			4
	Wallemia hederae	EXF-5753	1			0	0	4
	Wallemia hederae	EXF-5753	1			0	0	11																							210
38	Wallemia ichthyophaga	EXF-994	1			15	0	0	28.5								11.5				6.5			5																8.5			12
39	Wallemia ichthyophaga	EXF-994	1			20	0	0	20								13.5							5																14			12.5
41	Wallemia ichthyophaga	EXF-994	1			0	55	0
43	Wallemia ichthyophaga	EXF-994	1			0	70	0
44	Wallemia ichthyophaga	EXF-994			1	5	0	0
	Wallemia ichthyophaga	EXF-994	1			0	0	11
	Wallemia ichthyophaga	EXF-994	1			0	0	17
45	Wallemia ichthyophaga	EXF-3555	1			15	0	0	12.5								6.5				4																			7.5			7.5
46	Wallemia ichthyophaga	EXF-3555	1			20	0	0	10								12							4																14.5
48	Wallemia ichthyophaga	EXF-3555	1			0	55	0
49	Wallemia ichthyophaga	EXF-3555	1			0	70	0
50	Wallemia ichthyophaga	EXF-3555			1	5	0	0
	Wallemia ichthyophaga	EXF-3555	1			0	0	11								5.5
	Wallemia ichthyophaga	EXF-3555	1			0	0	17
52	Wallemia ichthyophaga	EXF-5676	1			15	0	0										6
53	Wallemia ichthyophaga	EXF-5676	1			20	0	0										5.5
55	Wallemia ichthyophaga	EXF-5676	1			0	55	0
56	Wallemia ichthyophaga	EXF-5676	1			0	70	0
57	Wallemia ichthyophaga	EXF-5676			1	5	0	0
	Wallemia ichthyophaga	EXF-5676	1			0	0	11
	Wallemia ichthyophaga	EXF-5676	1			0	0	17
58	Wallemia ichthyophaga	EXF-6070	1			15	0	0	9									6.5						3.5																7.5
59	Wallemia ichthyophaga	EXF-6070	1			20	0	0				4												4
62	Wallemia ichthyophaga	EXF-6070	1			0	55	0
63	Wallemia ichthyophaga	EXF-6070	1			0	70	0
64	Wallemia ichthyophaga	EXF-6070			1	5	0	0
	Wallemia ichthyophaga	EXF-6070	1			0	0	11
	Wallemia ichthyophaga	EXF-6070	1			0	0	17
65	Wallemia ichthyophaga	EXF-6200	1			15	0	0			23	11																																			10
66	Wallemia ichthyophaga	EXF-6200	1			20	0	0
68	Wallemia ichthyophaga	EXF-6200	1			0	55	0
71	Wallemia ichthyophaga	EXF-6200	1			0	70	0
72	Wallemia ichthyophaga	EXF-6200			1	5	0	0
	Wallemia ichthyophaga	EXF-6200	1			0	0	11
	Wallemia ichthyophaga	EXF-6200	1			0	0	17
73	Wallemia muriae	CBS 116628	1			5	0	0											16.5											5.5											10
74	Wallemia muriae	CBS 116628	1			15	0	0											8																						9
77	Wallemia muriae	CBS 116628	1			0	20	0		10.5									9.5											4
79	Wallemia muriae	CBS 116628	1			0	55	0		17									7			6								5
81	Wallemia muriae	CBS 116628		1		0	0	0											9							5	4
82	Wallemia muriae	CBS 116628			1	5	0	0											17.5											10											11.5				6.5
	Wallemia muriae	CBS 116628	1			0	0	4
	Wallemia muriae	CBS 116628	1			0	0	11												5
83	Wallemia muriae	EXF-2361	1			5	0	0											9.5											5
84	Wallemia muriae	EXF-2361	1			15	0	0		10									8
88	Wallemia muriae	EXF-2361	1			0	20	0		14									11.5							4.5
89	Wallemia muriae	EXF-2361	1			0	55	0		12.5									7
91	Wallemia muriae	EXF-2361		1		0	0	0											4.5								4.5
92	Wallemia muriae	EXF-2361			1	5	0	0		13									11											7.5											7
	Wallemia muriae	EXF-2361	1			0	0	4
	Wallemia muriae	EXF-2361	1			0	0	11
93	Wallemia muriae	EXF-3554	1			5	0	0											6											5
94	Wallemia muriae	EXF-3554	1			15	0	0											5.5
97	Wallemia muriae	EXF-3554	1			0	20	0		11									5.5											3.5
99	Wallemia muriae	EXF-3554	1			0	55	0		10									5
101	Wallemia muriae	EXF-3554		1		0	0	0											4.5
102	Wallemia muriae	EXF-3554			1	5	0	0											6											5
	Wallemia muriae	EXF-3554	1			0	0	4
	Wallemia muriae	EXF-3554	1			0	0	11
103	Wallemia muriae	EXF-5673	1			5	0	0											10																						7				5
104	Wallemia muriae	EXF-5673	1			15	0	0		8
107	Wallemia muriae	EXF-5673	1			0	20	0		22									13							4.5
109	Wallemia muriae	EXF-5673	1			0	55	0											4.5
111	Wallemia muriae	EXF-5673		1		0	0	0											14.5							24	10			15											11			6
112	Wallemia muriae	EXF-5673			1	5	0	0		58									15											15		7									21
	Wallemia muriae	EXF-5673	1			0	0	4
	Wallemia muriae	EXF-5673	1			0	0	11												8
113	Wallemia muriae	EXF-5915	1			5	0	0		15.5									5																									6.5
114	Wallemia muriae	EXF-5915	1			15	0	0		7									7.5
117	Wallemia muriae	EXF-5915	1			0	20	0		13									5							4.5
119	Wallemia muriae	EXF-5915	1			0	55	0		12									5
121	Wallemia muriae	EXF-5915		1		0	0	0																																					20.5
122	Wallemia muriae	EXF-5915			1	5	0	0																						8											8			7	4
	Wallemia muriae	EXF-5915	1			0	0	4
	Wallemia muriae	EXF-5915	1			0	0	11
123	Wallemia sebi	CBS 818.96	1			5	0	0		23									9.5							4.5				5															8.5
124	Wallemia sebi	CBS 818.96	1			15	0	0		34									7.5																						11				10
125	Wallemia sebi	CBS 818.96	1			20	0	0											4.5
127	Wallemia sebi	CBS 818.96	1			0	20	0											7							5				4.5
129	Wallemia sebi	CBS 818.96	1			0	65	0
130	Wallemia sebi	CBS 818.96		1		0	0	0											7							4.5	7.5			5
131	Wallemia sebi	CBS 818.96			1	5	0	0											15											6											12				11
	Wallemia sebi	CBS 818.96	1			0	0	4
	Wallemia sebi	CBS 818.96	1			0	0	11
132	Wallemia sebi	EXF-1441	1			5	0	0											18																						6.5				10
133	Wallemia sebi	EXF-1441	1			15	0	0		8									9																						7.5
134	Wallemia sebi	EXF-1441	1			20	0	0
136	Wallemia sebi	EXF-1441	1			0	20	0		14									13
137	Wallemia sebi	EXF-1441	1			0	65	0
139	Wallemia sebi	EXF-1441		1		0	0	0		19									21							14	14			24											10
140	Wallemia sebi	EXF-1441			1	5	0	0											17											11		10									36				13
	Wallemia sebi	EXF-1441	1			0	0	4
	Wallemia sebi	EXF-1441	1			0	0	11												6
141	Wallemia sebi	EXF-5860	1			5	0	0		17.5									6							4				4.5															5
142	Wallemia sebi	EXF-5860	1			15	0	0		20									9																						6
143	Wallemia sebi	EXF-5860	1			20	0	0		5.5									5
146	Wallemia sebi	EXF-5860	1			0	20	0		17									4.5							5				4
147	Wallemia sebi	EXF-5860	1			0	65	0
148	Wallemia sebi	EXF-5860		1		0	0	0											6								5
149	Wallemia sebi	EXF-5860			1	5	0	0		35									13											10											8				10.5
	Wallemia sebi	EXF-5860	1			0	0	4								10
	Wallemia sebi	EXF-5860	1			0	0	11
150	Wallemia sebi	CBS 110584	1			5	0	0		17									6							4.5				6.5
151	Wallemia sebi	CBS 110584	1			15	0	0		15									5
153	Wallemia sebi	CBS 110584	1			20	0	0
155	Wallemia sebi	CBS 110584	1			0	20	0		13									6							4				4
156	Wallemia sebi	CBS 110584	1			0	65	0
157	Wallemia sebi	CBS 110584		1		0	0	0											8							5	7
158	Wallemia sebi	CBS 110584			1	5	0	0		25									10
	Wallemia sebi	CBS 110584	1			0	0	4
	Wallemia sebi	CBS 110584	1			0	0	11
160	Wallemia sebi	MUCL 46253	1			5	0	0											12.5							4				6														6	6
161	Wallemia sebi	MUCL 46253	1			15	0	0		12.5									17.5			5																			8.5
162	Wallemia sebi	MUCL 46253	1			20	0	0
164	Wallemia sebi	MUCL 46253	1			0	20	0		18									8							4				4
165	Wallemia sebi	MUCL 46253	1			0	65	0
167	Wallemia sebi	MUCL 46253		1		0	0	0		15									19							26	20			10											13.5			16
168	Wallemia sebi	MUCL 46253			1	5	0	0		21									24											14								5			17
	Wallemia sebi	MUCL 46253	1			0	0	4
	Wallemia sebi	MUCL 46253	1			0	0	11												4
169	Wallemia mellicola	EXF-5675	1			5	0	0		18									9			5				4				5
170	Wallemia mellicola	EXF-5675	1			15	0	0		12									8			5																			5
171	Wallemia mellicola	EXF-5675	1			20	0	0											5
173	Wallemia mellicola	EXF-5675	1			0	20	0		16									9							6				7
174	Wallemia mellicola	EXF-5675	1			0	65	0
175	Wallemia mellicola	EXF-5675		1		0	0	0											7							10	14	6		18
176	Wallemia mellicola	EXF-5675			1	5	0	0		17									13								13			11											8
	Wallemia mellicola	EXF-5675	1			0	0	4
	Wallemia mellicola	EXF-5675	1			0	0	11
177	Wallemia mellicola	EXF-5677	1			5	0	0											12			5.5				6				8.5
178	Wallemia mellicola	EXF-5677	1			15	0	0		15									7			5								5											5
179	Wallemia mellicola	EXF-5677	1			20	0	0
181	Wallemia mellicola	EXF-5677	1			0	20	0		20									11							5				5
182	Wallemia mellicola	EXF-5677	1			0	65	0
183	Wallemia mellicola	EXF-5677		1		0	0	0											7							12	9			12														7
184	Wallemia mellicola	EXF-5677			1	5	0	0		25									15							10				15											10			12
	Wallemia mellicola	EXF-5677	1			0	0	4
	Wallemia mellicola	EXF-5677	1			0	0	11
185	Wallemia mellicola	EXF-5918	1			5	0	0		25									8			7				5				8
186	Wallemia mellicola	EXF-5918	1			15	0	0		5									4			4																			4
187	Wallemia mellicola	EXF-5918	1			20	0	0
189	Wallemia mellicola	EXF-5918	1			0	20	0		26									8							6				8
190	Wallemia mellicola	EXF-5918	1			0	65	0		5
191	Wallemia mellicola	EXF-5918		1		0	0	0		6.5									7							4	7			3														6
192	Wallemia mellicola	EXF-5918			1	5	0	0											11											13											6
	Wallemia mellicola	EXF-5918	1			0	0	4
	Wallemia mellicola	EXF-5918	1			0	0	11
193	Wallemia mellicola	MUCL 45615	1			5	0	0											13			6				6
194	Wallemia mellicola	MUCL 45615	1			15	0	0		10									9			6																			8
195	Wallemia mellicola	MUCL 45615	1			20	0	0											5
	Wallemia mellicola	MUCL 45615	1			0	20	0
	Wallemia mellicola	MUCL 45615	1			0	65	0		8
	Wallemia mellicola	MUCL 45615		1		0	0	0											10							25	20			4														9
	Wallemia mellicola	MUCL 45615			1	5	0	0											15								12			8											9
	Wallemia mellicola	MUCL 45615	1			0	0	4
	Wallemia mellicola	MUCL 45615	1			0	0	11
	Wallemia mellicola	UAMH 2757	1			5	0	0											24			11				6				7		5
	Wallemia mellicola	UAMH 2757	1			15	0	0		7.5									11.5			5																			6
	Wallemia mellicola	UAMH 2757	1			20	0	0
	Wallemia mellicola	UAMH 2757	1			0	20	0		23									14							8				6
	Wallemia mellicola	UAMH 2757	1			0	65	0		11												5
	Wallemia mellicola	UAMH 2757		1		0	0	0											23							14	10			5														11
	Wallemia mellicola	UAMH 2757			1	5	0	0		27									25							6				13		7									15			10
	Wallemia mellicola	UAMH 2757	1			0	0	4
	Wallemia mellicola	UAMH 2757	1			0	0	11												5
	Wallemia canadensis	MUCL 15061	1			5	0	0						20									8				6						4													10
	Wallemia canadensis	MUCL 15061	1			15	0	0
	Wallemia canadensis	MUCL 15061	1			0	20	0						8													5		4								10
	Wallemia canadensis	MUCL 15061	1			0	55	0
	Wallemia canadensis	MUCL 15061		1		0	0	0							5										25												15		7			10						20	6
	Wallemia canadensis	MUCL 15061			1	5	0	0							15												10							12			11					14						8
	Wallemia canadensis	MUCL 15061	1			0	0	4
	Wallemia canadensis	MUCL 15061	1			0	0	11												9
	Wallemia tropicalis	EXF-8739	1			5	0	0
	Wallemia tropicalis	EXF-8739	1			15	0	0
	Wallemia tropicalis	EXF-8739	1			0	20	0
	Wallemia tropicalis	EXF-8739	1			0	55	0
	Wallemia tropicalis	EXF-8739		1		0	0	0
	Wallemia tropicalis	EXF-8739			1	5	0	0
	Wallemia tropicalis	EXF-8739	1			0	0	4
	Wallemia tropicalis	EXF-8739	1			0	0	11
	Wallemia tropicalis	EXF-8746	1			5	0	0
	Wallemia tropicalis	EXF-8746	1			15	0	0
	Wallemia tropicalis	EXF-8746	1			0	20	0
	Wallemia tropicalis	EXF-8746	1			0	55	0
	Wallemia tropicalis	EXF-8746		1		0	0	0
	Wallemia tropicalis	EXF-8746			1	5	0	0
	Wallemia tropicalis	EXF-8746	1			0	0	4
	Wallemia tropicalis	EXF-8746	1			0	0	11
	Wallemia tropicalis	EXF-8744	1			5	0	0
	Wallemia tropicalis	EXF-8744	1			15	0	0
	Wallemia tropicalis	EXF-8744	1			0	20	0
	Wallemia tropicalis	EXF-8744	1			0	55	0
	Wallemia tropicalis	EXF-8744		1		0	0	0
	Wallemia tropicalis	EXF-8744			1	5	0	0
	Wallemia tropicalis	EXF-8744	1			0	0	4
	Wallemia tropicalis	EXF-8744	1			0	0	11
	YES = Yeast Extract Sucrose agar
YES = Yeast Extract Sucrose agar	CYA = Czapek Yeast Autolysate agar with 50 g/L NaCl
CYA = Czapek Yeast Autolysate agar with 50 g/L NaCl	WATM = Wickerhams Antibiotic Test Medium
WATM = Wickerhams Antibiotic Test Medium	a: CBS = CBS-KNAW Fungal Biodiversity Centre, Utrecht, The Netherlands
	b: EXF = Ex Culture Collection of the Department of Biology, Biotechnical Faculty, University of Ljubljana in Ljubljana, Infrastructural Centre Mycosmo, MRIC UL, Ljubljana, Slovenia
	c: MUCL = Mycotheque of the Catholic University of Louvain, Louvain la Neuve, Belgium
	d: UAMH = University of Alberta Microfungus Collection and Herbarium, Edmonton, Canada
	e: DAOM = Canadian Collection of Fungal Cultures, Agriculture and Agri-Food Canada, Ottawa, Canada
[truncated: 55 more columns]
