# Supplementary material for: Production of Secondary Metabolites in Extreme Environments: Food- and Airborne Wallemia spp. Produce Toxic Metabolites at Hypersaline Conditions
Source: PLoS One. 2016 Dec 30;11(12):e0169116. doi: 10.1371/journal.pone.0169116 (PMC5201246; doi:10.1371/journal.pone.0169116)
Supplement: S5 Table — (XLSX) [file pone.0169116.s006.xlsx]

## Sheet: S5
S5 Table: Detection of wallimidione, walleminone, walleminol, UCA 1064-A and UCA 1064-B by mass spectroscopy.
Number	Species	Strain	Solute added	Wallimidione		Walleminone		Walleminol-isomer		UCA 1064-A		UCA 1064-B
				Area (arbitrary unit)	RT	Area (arbitrary unit)	RT	Area (arbitrary unit)	RT	Area (arbitrary unit)	RT	Area (arbitrary unit)	RT
1	Wallemia sebi	EXF-1441	5% NaCl	14956.3	5.4778	469343	8.54	264611	8.78
1	Wallemia sebi	EXF-5860	15% NaCl	36658.6	5.4855	206255	8.5451	54288	8.78
1	Wallemia sebi	CBS 110584	15% NaCl	27741.9	5.49935	227076	8.55					16180	10.4853
1	Wallemia sebi	CBS 110584	5% NaCl	17540.5	5.49227	186294	8.56	28468	8.8
1	Wallemia sebi	MUCL 46253	15% NaCl	31751.7	5.49128	281450	8.55	193361	8.79			87998.9	10.4725
1	Wallemia sebi	MUCL 46253	0% NaCl	24876.9	5.48847	532928	8.55	149952	8.78			12652.3	10.4692
1	Wallemia sebi	MUCL 46253	5% NaCl	17116.7	5.46833	630397	8.52	620349	8.76			102917	10.4521
2	Wallemia mellicola	EXF-5675	5% NaCl	36757.5	5.47987	731293	8.54	51956	8.77
2	Wallemia mellicola	EXF-5675	15% NaCl	25760.8	5.48553	206440	8.55	96516	8.78
2	Wallemia mellicola	EXF-5675	0% NaCl	15953	5.48737	85780	8.54	24329	8.77
2	Wallemia mellicola	EXF-5677	0% NaCl	25602.1	5.49055	40253	8.55					16622	10.4623
2	Wallemia mellicola	EXF-5677	5% NaCl	26536.1	5.46793	179010	8.53	85748	8.77
2	Wallemia mellicola	EXF-5918	5% NaCl	11748.4	5.46417	97009	8.53	20402	8.76	19613291	9.91	1.92051e+07	10.4517
3	Wallemia canadensis	MUCL 15061	5% NaCl	25078.1	5.48935	199704	8.55	35830	8.78485	2073286	9.91	474702	10.4544
3	Wallemia canadensis	MUCL 15061	0% NaCl	49049.1	5.48433	104839	8.56			2446321	9.92	634473	10.4642
3	Wallemia canadensis	MUCL 15061	15% NaCl			74741	8.55			3052051	9.91	1.42716e+06	10.451
4	Wallemia tropicalis	EXF-8746	5% NaCl	2.97076e+06	5.50287					39609416	9.98	2.99301e+07	10.476
4	Wallemia tropicalis	EXF-8746	15% NaCl	3.33235e+06	5.46798					36366491	9.96	3.05809e+06	10.363
5	Wallemia muriae	CBS 116628	0% NaCl	18712.1	5.48072	91592	8.54	49798	8.78	154717	9.92	116953	10.4625
5	Wallemia muriae	EXF-3554	5% NaCl	11903.9	5.48067	12229	8.54			53401	9.93	30519.4	10.4691
5	Wallemia muriae	EXF-5673	0% NaCl	25567.5	5.49072			66968	8.76	1132947	9.92	517754	10.4574
5	Wallemia muriae	EXF-5673	5% NaCl	17246	5.48672	254454	8.55	42124	8.78	4240329	9.91	3.60759e+06	10.4537
5	Wallemia muriae	EXF-5915	5% NaCl							3719903	9.92	3.49244e+06	10.4544
6	Wallemia ichthyophaga	EXF-6070	15% NaCl	22913	5.48317					15373	9.92
6	Wallemia ichthyophaga	EXF-6070	20% NaCl	35364.1	5.47998					21161	9.93	18540.1	10.4615
6	Wallemia ichthyophaga	EXF-6200	15% NaCl									31656.8	10.4691
7	Wallemia hederae	EXF-5753	5% NaCl	16513.8	5.48992							18053.9	10.4761
7	Wallemia hederae	EXF-5753	15% NaCl	15038.6	5.49885
7	Wallemia hederae	EXF-5753	0% NaCl	12935.6	5.48103
7	Wallemia hederae	EXF-5753	5% NaCl									15937.7	10.4678
CBS = CBS-KNAW Fungal Biodiversity Centre, Utrecht, The Netherlands
EXF = Ex Culture Collection of the Department of Biology, Biotechnical Faculty, University of Ljubljana in Ljubljana, Infrastructural Centre Mycosmo, MRIC UL, Ljubljana, Slovenia
MUCL = Mycotheque of the Catholic University of Louvain, Louvain la Neuve, Belgium
UAMH = University of Alberta Microfungus Collection and Herbarium, Edmonton, Canada
DAOM = Canadian Collection of Fungal Cultures, Agriculture and Agri-Food Canada, Ottawa, Canada
